# Supplementary material for: Predicting Cellular Growth from Gene Expression Signatures
Source: PubMed Central journal article supplement (PMC2599889; doi:10.1371/journal.pcbi.1000257), 2009-01-02

**Predictions for Chemostat Heat Pulse, 0.05/hr**

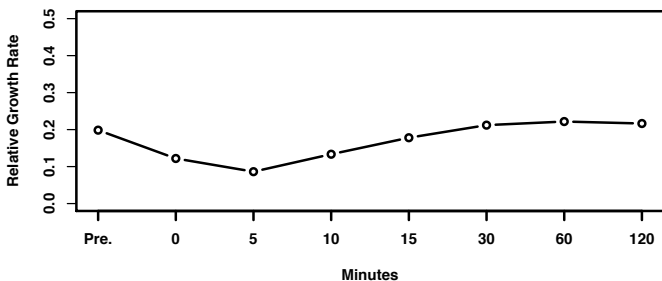

**Predictions for Chemostat Heat Pulse, 0.1/hr**

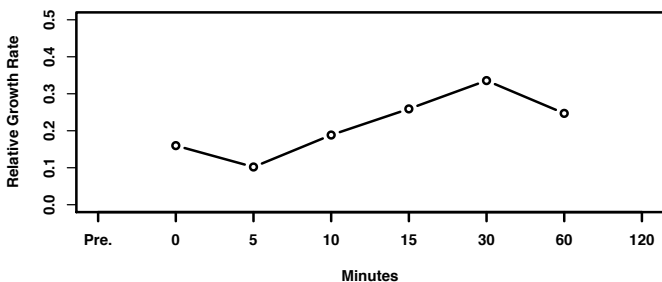

**Predictions for Chemostat Heat Pulse, 0.15/hr**

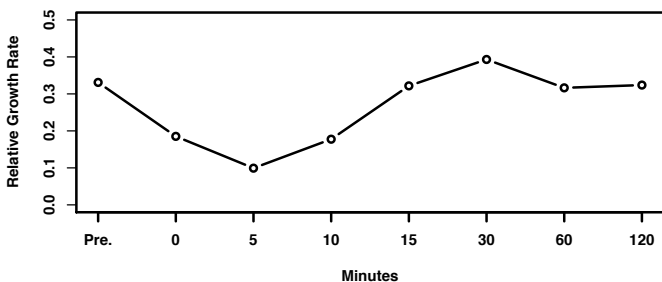

**Predictions for Chemostat Heat Pulse, 0.2/hr**

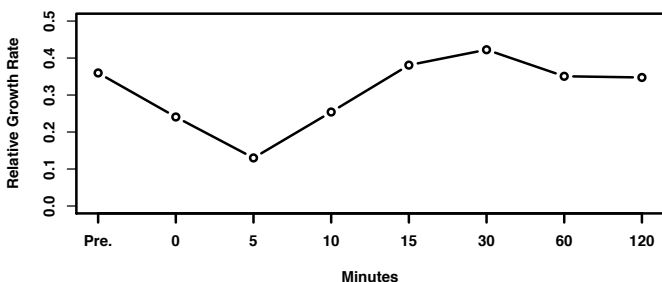

**Predictions for Chemostat Heat Pulse, 0.25/hr**

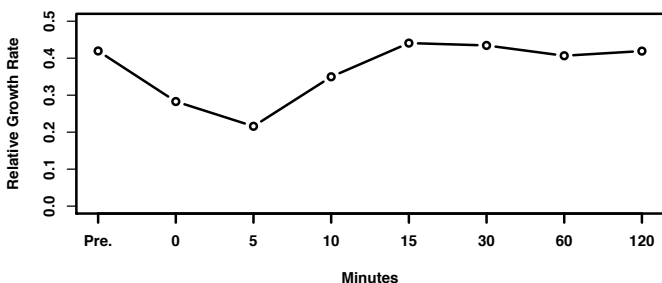

Supplement: pcbi.1000257.s002.pdf [file pcbi.1000257.s002.pdf]
