# Supplementary material for: Predicting Cellular Growth from Gene Expression Signatures
Source: PubMed Central journal article supplement (PMC2599889; doi:10.1371/journal.pcbi.1000257), 2009-01-02

# Distribution of Slopes

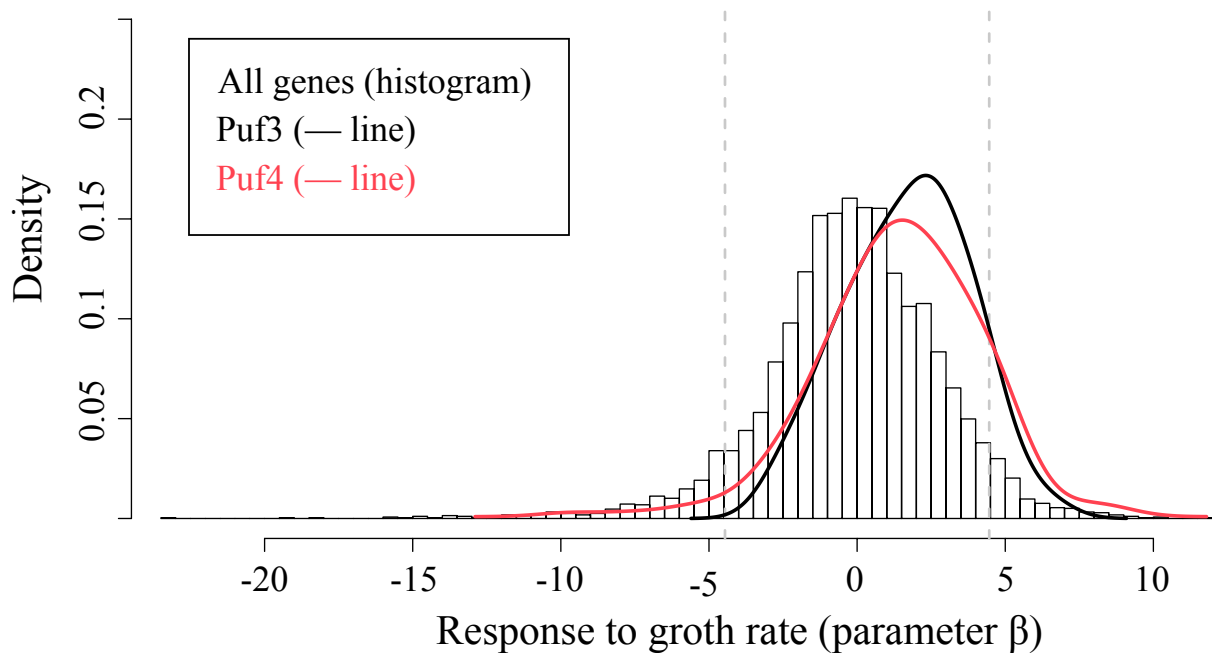

Supplement: pcbi.1000257.s004.pdf [file pcbi.1000257.s004.pdf]
