# Supplementary material for: Predicting Cellular Growth from Gene Expression Signatures
Source: PLoS Comput Biol. 2009 Jan 2;5(1):e1000257. doi: 10.1371/journal.pcbi.1000257 (PMC2599889; doi:10.1371/journal.pcbi.1000257)
Supplement: Table S1 — Expression of growth-specific genes for chemostat cultures at increasing growth rates exposed to a brief heat pulse. A collection of chemostats was run at growth rates ranging from 0.05/hr to 0.25/hr. A brief (<30 s) heat pulse was administered immediately before time zero, and expression arrays were collected in a time course from before the pulse (pre.) to two hours after the pulse using the 0.1/hr pre-pulse time point as a reference. (Here we provide expression data for all the growth-specific genes. The genome-wide collection of gene expression data will appear in a subsequent publication.) (0.06 MB XLS) [file pcbi.1000257.s005.xls]

## Sheet: tmp
Supplemental Table S1: Calibration gene microarray data for chemostat cultures at increasing growth rates exposed to a brief heat pulse. A collection of chemostats was run at growth rates from 0.05/hr to 0.25/hr. A brief (<30s) heat pulse was administered immediately before time zero, and microarrays were collected in a time course from before the pulse (pre.) to two hours after the pulse using t…
UID	NAME	GWEIGHT	0.05/hr, Pre.	0.05/hr, 0m	0.05/hr, 5m	0.05/hr, 10m	0.05/hr, 15m	0.05/hr, 30m	0.05/hr, 60m	0.05/hr, 120m	0.1/hr, 0m	0.1/hr, 5m	0.1/hr, 10m	0.1/hr, 15m	0.1/hr, 30m	0.15/hr, 60m	0.15/hr, Pre.	0.15/hr, 0m	0.15/hr, 5m	0.15/hr, 10m	0.15/hr, 15m	0.15/hr, 30m	0.15/hr, 60m	0.15/hr, 120m	0.2/hr, Pre.	0.2/hr, 0m	0.2/hr, 5m	0.2/hr, 10m	0.2/hr, 15m	0.2/hr, 30m	0.2/hr, 60m	0.2/hr, 120m	0.25/hr, Pre.	0.25/hr, 0m	0.25/hr, 5m	0.25/hr, 10m	0.25/hr, 15m	0.25/hr, 30m	0.25/hr, 60m	0.25/hr, 120m
Q0130	OLI1 || protein complex assembly* || structural molecule activity* || Q0130 || 1081841	1	-1.43	-0.88	-0.99	-0.6	-0.59	-0.78	-0.97	-1.32	-0.34	-0.21	-0.69	-0.77	-1.05	-0.27	-0.75	-0.65	-0.74	-0.48	-1.06	-0.67	-0.71	-0.88	-1.39	-1.19	-0.38	-0.62	-1.08	-0.82	-0.72	-0.56	-1.19	-1.62	-0.74	-1.26	-0.68	-1.19	-1.12	-1.4
YBL048W	|| || || YBL048W || 1080938	1	0.71	0.89	1.41	1.5	1.28	0.61	0.61	0.49	0.16	1	0.85	0.52	-0.51	0.08	-1.23	-0.68	0.09	0.37	-0.2	-1.34	-0.93	-1.29	-1.82	-1.61	-0.6	-0.51	-1.13	-2.18	-1.8	-2.04	-2.51	-2.06	-1.39	-1.55	-2.03	-2.53	-2.46	-2.47
YBL049W	MOH1 || biological process unknown || molecular function unknown || YBL049W || 1081344	1	0.71	0.79	1.43	1.47	1.28	0.64	0.76	0.67	0.37	1.18	1.01	0.68	-0.41	0.24	-1.35	-0.53	0.25	0.5	-0.01	-1.2	-0.98	-1.34	-1.76	-1.52	-0.39	-0.72	-0.91	-2.16	-1.91	-1.89	-2.38	-1.79	-1.12	-1.34	-1.71	-2.35	-2.32	-2.37
YBL087C	RPL23A || protein biosynthesis || structural constituent of ribosome || YBL087C || 1082745	1	-0.33	-0.93	-1.33	-0.6	-0.43	-0.03	0.08	0.1	-0.01	-0.78	-0.27	0.57	0.95	-0.05	0.4	-0.21	-0.95	-0.68	0.64	1.3	0.42	0.39	0.21	0.26	-0.7	-0.07	0.56	1.58	0.47	-0.25	1.16	0.83	-0.16	0.85	1.62	1.57	0.92	1.13
YBR072W	HSP26 || response to stress* || unfolded protein binding || YBR072W || 1084960	1	1.65	2.35	2.9	3.09	2.88	1.46	0.98	1.02	2.68	4.25	3.47	2.41	-1.26	-0.18	-1.31	1.7	3.39	3.61	1.73	-2.15	-0.93	-1.52	-2.52	0.77	3.1	2.8	0.46	-3.38	-1.65	-2.36	-3.75	0.22	2.38	1.61	-0.37	-3.53	-3.2	-3.79
YBR085W	AAC3 || anaerobic respiration || ATP:ADP antiporter activity || YBR085W || 1086753	1	-0.22	-0.63	-0.62	-0.37	-0.26	-0.35	-0.34	-0.35	-0.45	-0.46	0.1	0.22	-0.17	-0.12	0.49	0.37	0.56	0.82	1.14	0.25	0.61	0.56	1.07	0.64	0.63	1.36	1.88	0.59	0.77	0.93	1.26	1.06	1.36	1.99	1.76	0.93	1.15	1.22
YBR116C	|| || || YBR116C || 1084440	1	1.34	3.61	4.98	4.59	3.38	1.19	1.18	0.82	3.37	5.58	5.02	3.66	-0.16	0.58	-2.24	2.05	4.58	4.36	2.28	-1.72	-1.11	-2.08	-3.02	0.9	3.79	3	1.06	-2.55	-2.25	-3.17	-3.53	-0.26	1.9	1	-0.52	-3.1	-3.39	-3.73
YBR169C	SSE2 || protein folding || molecular function unknown || YBR169C || 1083474	1	0.6	1.6	2.17	1.89	1.42	0.57	0.34	0.22	1.4	2.15	1.26	0.32	-0.7	0.8	-0.88	1.52	2.92	1.97	-0.11	-1.35	-0.62	-0.88	-1.27	1.01	2.61	1.4	-0.98	-1.98	-1.21	-1.49	-2.11	0.94	2.27	0.7	-1.31	-2.15	-1.91	-2.05
YBR291C	CTP1 || mitochondrial citrate transport || tricarboxylate carrier activity || YBR291C || 1086076	1	-0.55	-1.78	-2.2	-1.32	-0.65	-0.21	-0.08	-0.21	-1.64	-2.22	-0.39	0.19	0.7	0.1	0.43	-1.37	-2.14	-1.24	0.35	1.13	0.69	0.29	0.72	-0.77	-1.76	-0.15	1.3	1.48	0.92	0.79	1.01	-0.53	-0.99	0.74	1.46	1.59	1.1	1.05
YCR021C	HSP30 || response to stress || molecular function unknown || YCR021C || 1083695	1	2.35	5.99	6.37	5.93	5.37	2.58	2.18	1.57	6.01	6.64	4.78	2.47	0.59	-0.59	-0.12	5.41	6.64	5.81	2.86	0.47	0.71	-0.14	-1.32	4.69	6.36	3.16	0.21	-0.62	-1.17	-1.35	-1.14	4.2	4.95	0.81	0.03	-0.79	-0.77	-0.77
YDL014W	NOP1 || rRNA modification* || methyltransferase activity || YDL014W || 1083083	1	0.09	-0.98	-2.69	-1.53	-0.07	0.68	0.49	0.05	-0.93	-3.48	-0.91	0.19	0.92	0.35	1.59	0.06	-2.23	-0.47	1.73	2.48	1.29	1.41	1.91	0.76	-2.47	0.84	2.44	2.63	1.44	1.81	2.23	1.08	-1.06	1.74	2.89	2.61	1.96	2.13
YDL081C	RPP1A || translational elongation* || structural constituent of ribosome || YDL081C || 1083175	1	-0.74	-0.96	-1.62	-1.02	-0.82	0.02	-0.08	-0.07	-0.07	-0.77	-0.77	-0.09	0.47	-0.94	0.35	-0.46	-1.48	-1.43	0.06	1.18	0.15	0.2	0.08	0.33	-0.79	-0.36	-0.05	1.42	0.5	-0.07	1.21	0.69	0.15	0.59	1.3	1.36	0.77	1.1
YDL085W	NDE2 || ethanol fermentation* || NADH dehydrogenase activity || YDL085W || 1082045	1	0.44	1.62	2.75	1.75	0.86	0.11	0.28	0.31	1.24	2.59	1.6	0.29	-1.2	0.24	-0.8	0.92	2.2	1.38	-0.34	-1.75	-0.55	-0.99	-1.49	0	1.58	0.57	-0.83	-2.34	-1.17	-1.39	-2.37	-0.84	0.3	-0.47	-1.59	-2.69	-1.98	-2.23
YDL130W	RPP1B || translational elongation* || structural constituent of ribosome || YDL130W || 1084850	1	-0.34	-0.77	-1.11	-0.39	-0.36	-0.23	-0.01	-0.12	-0.16	-0.58	-0.58	0.15	0.48	-0.27	0.83	0.23	-0.73	-0.44	0.77	1.71	0.77	0.81	0.58	0.6	-0.27	-0.04	0.47	1.32	0.69	0.23	1.7	1.3	0.71	1.09	1.77	1.98	1.39	1.62
YDL169C	UGX2 || biological process unknown || molecular function unknown || YDL169C || 1082654	1	0.04	0.57	0.96	0.65	0.15	-0.12	0.01	0.08	0.6	1.28	0.3	-0.59	-1.16	0.26	-0.44	0.71	1.15	0.36	-1.15	-1.43	-0.35	-0.58	-0.67	0.35	1.03	-0.08	-1.88	-1.5	-0.65	-0.73	-1.05	0.03	0.6	-0.64	-2.01	-1.22	-0.98	-1.05
YDR070C	|| biological process unknown || molecular function unknown || YDR070C || 1083116	1	1.02	1.66	2.43	2.28	1.81	0.72	0.26	0.14	1.54	2.89	2.47	1.85	-0.87	-0.08	-1.22	0.69	2.08	1.98	0.82	-1.42	-0.88	-1.25	-1.97	-0.06	1.59	1.08	-0.06	-1.73	-1.33	-2.78	-2.49	-0.51	0.64	0	-0.64	-2.14	-1.98	-2.04
YDR171W	HSP42 || response to stress* || unfolded protein binding || YDR171W || 1085622	1	0.44	2.81	2.6	1.44	0.9	0.16	0.21	0.08	3.08	3.05	0.53	-1.1	-2	0.27	-0.93	3.43	4.17	1.15	-1.41	-1.85	-0.89	-0.93	-1.25	3.29	4.03	-0.07	-2.55	-2.31	-1.76	-1.71	-2	3.15	3.31	-1.13	-2.85	-2.23	-2.53	-2.19
YDR258C	HSP78 || response to stress* || ATPase activity* || YDR258C || 1084111	1	0.9	2.09	2.1	1.82	1.47	0.95	0.81	0.71	2.09	2.5	0.83	-0.24	-0.73	-0.55	-0.77	2.32	3.65	2.03	-0.53	-1.16	-0.74	-0.87	-1.11	2	3.7	1.12	-2	-2	-1.65	-1.49	-1.65	2.06	2.98	0.58	-2.52	-2.21	-2.19	-1.95
YDR379C-A	|| biological process unknown || molecular function unknown || YDR379C-A || 1085534	1	0.37	0.51	0.75	0.63	0.5	0.14	0.02	0.25	0.29	0.66	0.38	0.27	-0.65	0.04	-0.67	0.11	0.41	0.29	-0.42	-1.32	-0.46	-0.69	-1.11	-0.26	0.33	-0.11	-1.13	-2.01	-0.74	-2.14	-1.61	-0.51	-0.02	-0.73	-1.57	-2.18	-1.49	-1.7
YEL026W	SNU13 || nuclear mRNA splicing, via spliceosome* || RNA binding || YEL026W || 1081613	1	-0.8	-1.73	-2.34	-1.24	-0.66	-0.16	-0.16	-0.6	-0.82	-2.06	-0.64	0.33	0.94	-0.47	0.23	-1.13	-1.22	-0.71	0.98	1.16	0.12	0.13	0.36	-0.39	-1.64	0.18	1.29	1.43	0.42	0.57	0.98	0.04	-0.92	0.71	1.71	1.29	0.66	0.94
YEL040W	UTR2 || cell wall organization and biogenesis || molecular function unknown || YEL040W || 1081502	1	-0.57	-1.34	-2.02	-1.08	-0.97	-0.77	-0.61	-0.74	-1.55	-2.06	-0.58	-0.07	0.27	0.4	1.61	-0.29	-0.76	0.68	1.71	1.68	1.51	1.66	2.04	0.26	0	1.82	2.1	1.98	1.89	2.14	2.31	0.74	1.3	2.29	2.56	2.48	2.31	2.46
YGL031C	RPL24A || protein biosynthesis || structural constituent of ribosome* || YGL031C || 1081339	1	-0.19	-1.15	-1.58	-0.91	-0.63	-0.48	-0.23	-0.31	0	-0.62	-0.17	0.41	0.81	-0.04	0.42	-0.11	-1.25	-0.94	0.47	1.32	0.47	0.27	0.64	0.41	-0.77	0.03	0.7	1.45	0.59	0.36	1.38	0.8	0.15	0.79	1.41	1.53	1.13	1.15
YGL076C	RPL7A || protein biosynthesis || structural constituent of ribosome || YGL076C || 1082524	1	-0.59	-0.74	-1.15	-0.9	-0.48	-0.21	0.04	-0.03	-0.03	-0.79	-0.52	0.16	0.56	-0.16	0.26	-0.3	-1.04	-0.91	0.24	1.05	0.31	0.25	0.35	0.46	-0.5	0.02	0.37	1.44	0.63	-0.59	1.1	0.77	0.13	0.7	1.32	1.41	0.9	1.06
YGL121C	GPG1 || signal transduction || signal transducer activity || YGL121C || 1085628	1	0.61	0.58	0.88	1.19	1	0.59	0.43	0.28	0.19	0.77	0.9	0.69	-0.54	0.21	-1.13	-0.53	0.07	0.51	0.06	-1.39	-0.75	-1.13	-1.93	-1.23	-0.45	-0.33	-0.91	-2.54	-1.59	-1.82	-2.72	-2.02	-1.29	-1.81	-2.14	-2.97	-2.54	-2.64
YGL156W	AMS1 || carbohydrate metabolism* || alpha-mannosidase activity || YGL156W || 1085375	1	0.49	0.86	1.09	1.08	0.71	0.23	0.35	0.34	0.3	0.83	0.69	0.15	-1.36	-0.29	-0.52	0.13	0.92	0.83	-0.29	-1.61	-0.25	-0.5	-0.99	-0.4	0.58	0.26	-0.95	-2.28	-0.65	-1.15	-1.64	-0.77	0.12	-0.6	-1.21	-1.97	-1.42	-1.57
YGR032W	GSC2 || cell wall organization and biogenesis* || 1,3-beta-glucan synthase activity || YGR032W || 1081286	1	0.22	0.27	0.18	-0.11	-0.31	-0.33	0.09	0.31	0.15	-0.22	-0.58	-0.61	-0.65	-0.38	-0.34	-0.28	-0.49	-0.3	-0.65	-0.94	-0.36	-0.14	-0.72	-0.64	-0.68	-0.8	-1.13	-1.37	-0.67	-0.63	-1.54	-1.44	-1.5	-1.57	-1.83	-2.1	-1.43	-1.46
YGR043C	|| biological process unknown || transaldolase activity || YGR043C || 1082595	1	1.65	2.7	4.11	3.92	3.04	1.77	1.29	0.97	1.25	3.2	2.88	1.81	-0.35	0.51	-1.63	-0.35	1.99	2.32	0.86	-1.64	-1.5	-2	-2.23	-0.86	1.53	1.05	-0.04	-2.13	-1.92	-1.84	-2.28	-1.46	0.28	-0.12	-0.96	-2.24	-2.16	-2.22
YGR070W	ROM1 || cell wall organization and biogenesis* || signal transducer activity* || YGR070W || 1084320	1	0.5	1.29	1.69	1.04	0.45	0.11	0.04	0.08	1.11	1.52	0.22	-0.5	-0.55	0.37	-0.52	1.14	1.51	0.51	-1.02	-0.71	-0.39	-0.48	-0.79	0.9	1.33	-0.26	-1.44	-0.62	-0.8	-0.75	-1.36	0.44	0.67	-1.7	-2.18	-1.13	-1.59	-1.49
YGR142W	BTN2 || intracellular protein transport* || molecular function unknown || YGR142W || 1082612	1	1.33	4.45	1.33	1.62	1.94	1.38	1.2	1.26	5.5	2.31	-0.64	-0.48	-0.41	-0.19	-0.95	5.68	5.51	0.18	-0.77	-0.86	-0.28	-0.76	-1.14	5.71	4.83	-0.83	-1.5	-1.59	-1.62	-1.23	-0.72	6.01	3.79	-0.71	-1.29	-1.45	-1.45	-0.9
YGR236C	SPG1 || biological process unknown || molecular function unknown || YGR236C || 1083768	1	0.84	2.42	3.26	2.63	1.64	0.67	0.46	0.3	2.03	2.82	0.94	-0.12	-0.68	0.03	-1.01	1.55	2.55	0.91	-0.79	-1.16	-0.81	-0.88	-1.29	0.82	1.88	-0.59	-1.8	-1.14	-1.42	-0.89	-1.52	0.59	0.4	-0.86	-2.05	-1.42	-1.51	-1.52
YGR248W	SOL4 || pentose-phosphate shunt, oxidative branch || 6-phosphogluconolactonase activity || YGR248W || 1080701	1	0.37	2.71	3.42	2.52	0.99	-0.08	-0.21	-0.17	3	3.79	2.14	0.32	-1.83	0.22	-0.33	3.26	4.11	3.04	0.45	-0.69	-0.28	-0.52	-0.71	2.69	4.14	2.38	-0.52	-0.9	-0.75	-0.69	-1.7	2.27	3.25	1.45	-1.23	-1.11	-1.51	-2.01
YGR256W	GND2 || glucose metabolism || phosphogluconate dehydrogenase (decarboxylating) activity || YGR256W || 1080627	1	0.78	1.27	1.88	2.01	1.66	0.83	0.51	0.37	0.87	2.11	2.12	1.49	-0.94	0.05	-1.38	0.18	1.63	1.57	0.34	-2.02	-1.01	-1.42	-2.17	-0.85	1.14	0.82	-0.29	-2.67	-1.58	-2.35	-3.09	-2	-0.62	-1	-1.57	-2.91	-2.58	-2.94
YHR096C	HXT5 || hexose transport || glucose transporter activity* || YHR096C || 1082169	1	0.78	1.71	2.6	1.96	1.29	0.57	0.92	0.52	1.67	3.02	1.87	0.56	-1.07	-0.33	-1.8	0.51	1.74	1.04	-0.98	-2.64	-1.64	-1.82	-2.8	-0.9	1.1	-0.24	-2.42	-3.72	-2.89	-2.86	-4.53	-2.45	-0.54	-2.11	-4.04	-4.9	-4.32	-4.48
YHR128W	FUR1 || pyrimidine salvage || uracil phosphoribosyltransferase activity || YHR128W || 1084228	1	-0.91	-1.21	-2.3	-1.61	-0.9	-0.4	-0.42	-0.79	-0.49	-1.99	-0.47	0.43	0.87	-0.02	0.43	-0.27	-1.94	-1.08	0.93	1.3	0.45	0.22	0.75	0.11	-1.6	-0.06	1.57	1.26	0.49	0.84	0.93	0.38	-1.06	0.7	1.69	1.25	0.95	0.92
YIL136W	OM45 || biological process unknown || molecular function unknown || YIL136W || 1082389	1	0.42	1.56	2.5	2.39	1.74	0.37	0.18	0.15	1.48	2.5	2.04	0.8	-1.38	0.2	-1.01	1.05	2.18	1.71	-0.3	-1.41	-0.58	-0.92	-1.48	0.5	2.17	0.85	-1.4	-1.67	-1.02	-1.79	-2.25	-0.1	1.14	-0.5	-2.38	-1.82	-1.95	-2.28
YIL160C	POT1 || fatty acid beta-oxidation || acetyl-CoA C-acyltransferase activity || YIL160C || 1082968	1	1.39	1.76	2.19	2.29	1.84	1.28	1.54	1.55	0.57	1.51	1.35	0.85	-0.43	1.05	-1.32	-0.43	0.45	0.3	-0.6	-1.86	-0.4	-1.21	-1.38	-0.82	0.1	-0.26	-1.31	-2.35	-1.34	-1.68	-2.62	-2.02	-1.08	-1.73	-2.51	-2.66	-2.26	-2.75
YIR016W	|| biological process unknown || molecular function unknown || YIR016W || 1085070	1	-0.18	0.76	0.6	-0.07	-0.39	-0.42	-0.58	-0.67	0.97	0.66	-0.5	-1.15	-1.17	0.24	-0.48	0.85	0.43	-0.57	-1.14	-0.73	-0.48	-0.49	-0.89	0.61	0.2	-1.18	-1.59	-0.88	-0.85	-0.97	-1.1	0.55	-0.18	-1.61	-1.42	-0.86	-1.08	-1.06
YJL116C	NCA3 || mitochondrion organization and biogenesis || molecular function unknown || YJL116C || 1084506	1	1.82	2.21	2.18	1.49	1.42	1.99	2.27	1.98	0.4	0.41	0.2	0.01	0.71	0.1	-1.42	-1.36	-0.87	-1.47	-1.5	-1.03	-1.52	-1.86	-2.08	-2.26	-1.69	-2.27	-2.28	-2.16	-2.71	-2.39	-2.47	-2.06	-1.91	-2.05	-1.52	-2.27	-2.53	-2.26
YJL161W	|| biological process unknown || molecular function unknown || YJL161W || 1083712	1	0.64	2.4	2.96	1.96	1.09	0.24	0.09	0.11	1.87	2.84	1.43	0.32	-1.02	1.06	-0.73	1.89	3.08	1.84	-0.13	-1.05	-0.49	-0.84	-0.87	1.77	2.62	1.24	-0.43	-1.19	-0.68	-0.4	-1.12	1.13	1.86	0.27	-1.77	-1.21	-1.27	-1.61
YJR008W	|| biological process unknown || molecular function unknown || YJR008W || 1082730	1	0.31	1.1	1.44	1.3	0.69	0.24	0.17	0.24	1.23	1.59	0.58	-0.22	-0.67	-0.05	-0.32	0.97	1.31	0.39	-0.83	-0.73	-0.25	-0.38	-0.83	0.52	1.01	-0.73	-2.17	-0.84	-0.67	-0.6	-1.25	0.21	0.15	-1.79	-2.53	-0.91	-1.04	-1.15
YKR046C	PET10 || aerobic respiration || molecular function unknown || YKR046C || 1081938	1	0.67	0.59	0.62	0.66	0.65	0.62	0.39	0.3	0.05	0.09	0.22	0	-0.39	0.01	-0.65	-0.32	-0.09	-0.06	-0.57	-0.93	-0.7	-0.71	-0.75	-0.64	-0.14	-0.25	-0.62	-1.12	-0.88	-0.97	-1.54	-1.38	-0.97	-1.39	-1.41	-1.56	-1.53	-1.55
YLL026W	HSP104 || response to stress* || chaperone binding* || YLL026W || 1085018	1	0.66	1.69	2.39	1.88	1.34	0.61	0.38	0.55	2.2	2.91	1.1	-0.61	-1.4	-0.45	-0.91	2.11	3.46	2.2	-0.84	-1.52	-0.97	-1.1	-1.23	1.91	3.63	1.14	-2.31	-2.16	-1.65	-1.45	-1.96	1.94	3.18	0.4	-2.88	-2.31	-2.47	-2.12
YLL067C	|| biological process unknown || helicase activity || YLL067C || 1085059	1	0.11	0.6	0.21	0.12	0.09	0.29	0.54	0.49	0.16	-0.08	-0.17	-0.58	-0.17	0.32	-0.08	0.01	-0.08	0.03	-0.92	-0.23	0.2	0.11	-0.45	-0.45	-0.11	-0.8	-1.38	-0.23	-0.07	-0.74	-0.78	-0.8	-0.42	-1.22	-1.27	-0.31	-0.34	-0.75
YLR312C	|| biological process unknown || molecular function unknown || YLR312C || 1082789	1	0.69	1.93	1.96	1.28	0.58	0.41	0.39	0.37	1.64	1.86	0.37	-0.76	-1.01	0.08	-1.05	1.11	1.19	-0.47	-2.03	-1.42	-0.83	-1.2	-1.39	0.78	0.79	-1.37	-3	-1.37	-1.27	-1.35	-2.1	0.28	-0.27	-2.62	-3.54	-1.63	-2.08	-1.96
YLR327C	|| biological process unknown || molecular function unknown || YLR327C || 1081648	1	0.9	4.13	3.69	1.54	0.36	0.01	0.23	0.36	3.5	2.62	-0.84	-2.05	-1.67	-0.18	-0.35	4.12	4.53	0.59	-1.84	-1.01	-0.27	-0.32	-0.68	4.02	3.73	-1.52	-2.97	-0.78	-0.92	-0.5	-0.89	3.74	1.67	-2.71	-3.22	-0.63	-1.25	-0.98
YLR406C	RPL31B || protein biosynthesis || structural constituent of ribosome || YLR406C || 1084421	1	-0.33	-1	-0.96	-0.31	-0.41	-0.57	-0.39	-0.43	-0.37	-1.15	0.19	0.94	0.81	-0.34	0.77	0.1	-1.61	0	1.42	-1.05	0.23	0.67	0.58	0.26	-1.3	0.45	1.02	1.42	0.62	-0.54	1.57	0.95	-0.03	1.3	2.18	1.61	1.22	1.31
YML056C	IMD4 || biological process unknown || IMP dehydrogenase activity || YML056C || 1083004	1	-0.18	-1.36	-2.04	-1.24	-0.25	0.11	-0.07	-0.26	-1.15	-2.16	-0.17	0.66	1.29	0.01	0.52	-1.08	-1.66	-0.46	1.7	1.76	0.68	0.4	0.72	-0.72	-1.8	0.56	2.17	1.79	0.63	0.71	0.92	-0.59	-1.37	1.51	2.19	1.57	1.03	0.89
YML128C	MSC1 || meiotic recombination || molecular function unknown || YML128C || 1084369	1	0.96	2.05	2.85	2.62	2.03	0.81	0.76	0.89	1.89	2.92	2.49	1.22	-1.62	-0.17	-1.11	1.39	2.67	2.23	0.39	-1.88	-0.68	-1.19	-1.61	0.67	2.36	1.69	-0.06	-2.18	-1.13	-1.66	-2.58	-0.13	0.98	0.68	-0.7	-2.19	-2.03	-2.54
YMR174C	PAI3 || vacuolar protein catabolism || endopeptidase inhibitor activity || YMR174C || 1086588	1	1.1	1.49	2.11	2.34	2.09	1.07	0.59	0.46	1.18	2.48	2.64	2.31	0.11	-0.12	-1.54	0	1.6	1.69	1.08	-1.36	-0.87	-1.37	-1.91	-0.6	1.17	0.87	0.05	-1.79	-1.11	-2.37	-2.02	-0.76	0.35	-0.08	-0.47	-1.74	-1.82	-2.04
YMR196W	|| biological process unknown || molecular function unknown || YMR196W || 1083754	1	0.43	1.49	2.57	2.07	1.04	0.06	0.18	0.23	1.25	2.56	1.59	0.11	-1.91	0.27	-0.18	1.9	3.1	2.23	-0.05	-1.51	0.11	-0.24	-0.37	1.45	3.01	1.95	-0.38	-1.87	-0.13	-0.54	-1.24	1.2	2.56	1.29	-0.53	-1.6	-0.85	-1.2
YMR242C	RPL20A || protein biosynthesis || structural constituent of ribosome || YMR242C || 1083119	1	-0.7	-1.34	-1.65	-1.17	-0.31	-0.41	-0.14	-0.15	-0.19	-1.41	-0.35	0.47	1.04	-0.24	-0.07	-0.67	-2.34	-1.3	0.12	1.06	0.23	-0.14	0.52	0.1	-1.81	-0.15	0.84	1.54	0.48	-0.92	0.9	0.47	-0.35	0.49	1.17	1.61	1.08	1
YMR322C	SNO4 || pyridoxine metabolism || unfolded protein binding* || YMR322C || 1081145	1	0.7	1.45	1.4	1.41	0.97	0.57	0.42	0.53	1.13	1.59	0.91	0.02	-0.99	0.06	-0.98	0.38	0.8	0.52	-0.7	-1.55	-0.96	-1.02	-1.36	-0.12	0.58	-0.21	-1.75	-1.78	-1.37	-1.38	-1.91	-0.62	-0.09	-1.26	-2.33	-1.97	-1.99	-1.9
YNL093W	YPT53 || endocytosis* || GTPase activity || YNL093W || 1084631	1	0.17	0.77	1.4	0.7	0.22	0.14	0.23	0.37	0.71	1.52	0.38	-0.52	-0.92	0.15	-1.38	0.06	0.94	-0.34	-1.65	-1.61	-0.89	-0.94	-1.45	-0.57	0.56	-1.13	-2.1	-1.66	-1.19	-1.1	-2.44	-1.67	-0.67	-1.98	-3.13	-2.41	-1.95	-2.41
YNL237W	YTP1 || biological process unknown || molecular function unknown || YNL237W || 1081587	1	0.35	0.91	1.05	0.72	0.47	0.27	0.04	0.21	0.71	1.22	0.61	-0.08	-0.56	-0.08	-0.57	0.46	0.93	0.55	-0.67	-0.8	-0.43	-0.61	-0.67	0.25	0.85	0.15	-1.25	-1.04	-0.62	-0.7	-1.62	-0.42	0.35	-0.88	-1.72	-1.59	-1.48	-1.51
YNL301C	RPL18B || protein biosynthesis || structural constituent of ribosome || YNL301C || 1084744	1	-0.53	-0.75	-0.77	-0.17	0.09	-0.02	0.02	0.17	-0.28	-0.66	-0.03	0.58	0.74	-0.45	0.65	-0.31	-1.11	0.13	1.51	1.71	0.52	0.48	0.4	-0.16	-1.09	0.36	1.53	1.77	0.13	0.67	1.24	0.77	-0.38	1.43	2.39	2.04	1.29	1.54
YOL014W	|| biological process unknown || molecular function unknown || YOL014W || 1084216	1	-0.93	-1.21	-0.91	-1.02	-0.5	-0.17	-0.24	-0.53	0.17	0.15	-0.76	-0.33	0.57	-0.45	0.93	0.68	0.23	0.01	0.95	1.65	0.42	0.38	1.54	1.43	0.68	0.43	1.77	2.08	1.16	2.3	2.34	2.43	1.96	1.76	2.76	2.77	2.31	2.41
YOL039W	RPP2A || translational elongation* || structural constituent of ribosome || YOL039W || 1086302	1	-0.53	-1.33	-1.84	-1.06	-0.98	-0.98	-0.7	-0.86	-0.14	-0.84	-0.24	0.31	0.78	-0.44	0.58	-0.06	-1.29	-0.64	0.67	1.42	0.49	0.33	0.67	0.59	-0.6	0.17	0.56	1.71	0.78	-0.21	1.43	1.11	0.41	1.14	1.61	1.76	0.94	1.28
YOL052C-A	DDR2 || response to stress || molecular function unknown || YOL052C-A || 1081749	1	0.64	1.31	1.77	1.92	2	1.5	1.42	1.31	1.25	2.23	1	1.41	-0.76	-1.28	-2.35	-1.73	0.44	0.13	-1.77	-2.59	-1.99	-2.14	-2.84	-0.69	0.18	0.08	-3.4	-2.56	-1.75	-4.26	-3.52	-1.84	-0.81	-1.97	-2.79	-3.44	-3.4	-3.47
YOL120C	RPL18A || protein biosynthesis || structural constituent of ribosome || YOL120C || 1082057	1	-0.2	-0.95	-1.44	-0.94	-0.78	-0.55	-0.43	-0.55	-0.33	-1.01	-0.47	0.09	0.69	-0.09	0.61	0.07	-1.31	-0.84	0.49	1.58	0.57	0.52	0.86	0.63	-0.78	-0.15	0.89	1.72	0.61	0.55	1.52	1.02	-0.04	0.83	1.36	1.71	1.15	1.34
YOR167C	RPS28A || protein biosynthesis || structural constituent of ribosome || YOR167C || 1081871	1	-0.36	-0.84	-1.36	-1.08	-0.5	-0.08	0.07	-0.02	0.06	-0.61	-0.31	0.38	0.94	0.63	-0.06	-0.93	-1.61	-1.46	-0.39	0.65	-0.12	-0.06	0.01	0.07	-1.28	-0.42	-0.3	1.07	0.37	-1.33	0.74	0.34	-0.35	0.12	0.76	0.89	0.42	0.62
YOR173W	DCS2 || biological process unknown || molecular function unknown || YOR173W || 1082030	1	0.47	2.12	2.38	1.74	0.79	-0.04	0.09	0.07	2	2.42	1.09	-0.42	-1.68	0.33	-0.71	1.96	2.67	1.63	-0.53	-1.24	-0.49	-0.76	-1.15	1.45	2.39	0.81	-1.62	-1.6	-1.05	-1.13	-2.22	0.83	1.76	-0.19	-2.61	-1.69	-1.86	-2.23
YOR338W	|| biological process unknown || molecular function unknown || YOR338W || 1084854	1	0.52	1	1.34	1.06	1.09	1.1	0.95	0.53	0.19	0.73	0.82	0.7	0.57	0.34	-0.9	-0.11	0.93	0.57	1.01	-0.36	-0.73	-0.9	-0.84	-0.78	0.31	0.56	1.13	-1.1	-1.05	-0.82	-1.29	-0.98	-0.23	0.48	0.47	-1.4	-1.07	-1.19
YPL186C	UIP4 || biological process unknown || molecular function unknown || YPL186C || 1085973	1	0.31	1.5	1.85	1.53	1.01	0.14	0.09	0.12	1.86	2.33	1.38	0.15	-1.75	-0.18	-1.2	1.43	1.77	0.65	-1.12	-1.95	-0.91	-1.41	-1.56	0.81	1.54	0.08	-1.88	-2.22	-1.4	-1.59	-2.4	0.71	1.14	-0.76	-2.63	-2.08	-2.17	-2.45
YPL280W	HSP32 || biological process unknown || unfolded protein binding* || YPL280W || 1085743	1	0.63	1.29	1.27	1.22	0.95	0.33	0.37	0.46	0.94	1.48	0.81	-0.08	-1.02	0.11	-0.96	0.32	0.79	0.48	-0.74	-1.64	-0.93	-0.97	-1.32	-0.16	0.47	-0.2	-1.58	-1.8	-1.39	-1.3	-1.9	-0.61	-0.16	-1.23	-2.3	-2.03	-1.91	-1.89
