# Supplementary material for: Predicting Cellular Growth from Gene Expression Signatures
Source: PLoS Comput Biol. 2009 Jan 2;5(1):e1000257. doi: 10.1371/journal.pcbi.1000257 (PMC2599889; doi:10.1371/journal.pcbi.1000257)
Supplement: Table S2 — Expression of growth-specific genes for chemostat cultures at increasing growth rates limited on various nitrogen sources. A collection of chemostats was run at growth rates from ∼0.06/hr to ∼0.21/hr limited on one of several different nitrogen sources, including ammonium, allantoin, glutamate, arginine, glutamine, urea, and proline. (Here we provide expression data for all the growth-specific genes. The genome-wide collection of gene expression data will appear in a subsequent publication.) (0.04 MB XLS) [file pcbi.1000257.s006.xls]

## Sheet: tmp
Supplemental Table S2: Calibration gene microarray data for chemostat cultures at increasing growth rates limited on various nitrogen sources. A collection of chemostats was run at growth rates from ~0.06/hr to ~0.21/hr limited on one of several different nitrogen sources. The resulting gene expression data relevant to growth rate inference is provided here, and the complete dataset will appear i…
YORF	NAME	GWEIGHT	Allantoin 0.06/hr	Allantoin 0.12/hr	Allantoin 0.16/hr	Allantoin 0.21/hr	Arginine 0.06/hr	Arginine 0.12/hr	Arginine 0.16/hr	Arginine 0.21/hr	Proline 0.06/hr	Proline 0.12/hr	Proline 0.16/hr	Proline 0.21/hr	Glutamine 0.06/hr	Glutamine 0.12/hr	Glutamine 0.16/hr	Glutamine 0.21/hr	Urea 0.06/hr	Urea 0.13/hr	Urea 0.16/hr	Urea 0.2/hr	Glutamate 0.068/hr	Glutamate 0.13/hr	Glutamate 0.168/hr	Glutamate 0.21/hr
Q0130	OLI1	1	0.83	0.27	0.75	0.21	0.25	-0.19	0.12	-0.39	0.4	0.14	0.13	-0.23	0.7	-0.17	0	-0.25	1.47	1.31	1.14	0.62	1.8	0.59	1.01	1.15
YBL048W	YBL048W	1	-0.09	-1.13	-1.83	-2.42	0.06	-1.22	-2.07	-2.75	0.22	-0.81	-1.53	-1.99	-0.53	-1.29	-2.08	-2.36	-0.29	-1.9	-2.24	-3.1	0.01	-1.22	-1.27	-1.55
YBL049W	MOH1	1	-0.13	-1.02	-1.59	-2.15	0.19	-1.03	-1.72	-2.44	0.23	-0.76	-1.36	-1.66	-0.42	-1.37	-1.65	-1.94	-0.21	-1.52	-2.04	-3.02	0.05	-0.88	-0.86	-1.22
YBL087C	RPL23A	1	0.07	0.33	0.92	1.26	-0.11	0.34	1.21	1.77	0.1	0.99	1.11	1.66	0	1.4	1.27	1.83	0.38	1.42	1.96	2.23	0.27	0.63	1.45	1.76
YBR072W	HSP26	1	0.27	-3.25	-4.41	-4.69	0.98	-2.66	-4.27	-4.86	0.55	-1.45	-2.79	-4.01	1.01	-2.51	-4.06	-4.47	-0.42	-1.72	-3.38	-4.62	0.21	-2.73	-2.6	-3.38
YBR085W	AAC3	1	0.28	0.95	1.41	1.55	0.06	1.57	1.7	2	0.01	0.8	0.79	1.09	-0.05	1.66	2.03	2.16	0.52	2.32	2.17	2.24	0.32	1.41	1.56	1.87
YBR116C	YBR116C	1	-0.07	-2.36	-3.78	-4.59	0.1	-2.61	-4.74	-5.74	-0.36	-2.06	-3.4	-4.28	-0.15	-2.75	-5.2	-5.4	-0.23	-4.06	-3.86	-5.38	-0.5	-3.41	-3.41	-5.27
YBR169C	SSE2	1	0.02	-1.22	-2.13	-2.26	0.25	-1.29	-2.44	-2.21	0.29	-0.97	-1.57	-1.76	0.39	-0.99	-2.13	-1.97	0.14	-1.35	-2.12	-2.24	-0.18	-1.8	-2.04	-2.49
YBR291C	CTP1	1	-0.35	0.24	0.49	1	-0.22	0.57	0.96	1.4	0.02	-2.19	0.91	1.85	-0.61	0.69	0.85	1.17	-0.22	0.72	0.88	1.29	-0.38	0.67	0.73	1.09
YCR021C	HSP30	1	1.12	-2.13	-2.26	-2.87	0.49	-1.64	-3.19	-3.73	1.39	-0.38	-2.37	-3.32	0.39	-2.28	-3.27	-3.42	0.31	-0.34	-2.06	-3.37	0.58	-1.47	-1.47	-2.18
YDL014W	NOP1	1	-0.03	0.49	1.33	1.59	-0.25	0.92	1.58	1.78	-0.2	0.51	0.58	1.44	-0.71	0.56	1.49	1.67	0.18	1.09	1.78	2.18	0	1.36	1.49	1.65
YDL081C	RPP1A	1	-0.74	0.34	0.18	0.54	-0.62	-0.47	0.53	0.55	-0.32	0.05	0.37	0.69	-0.79	1.7	0.38	1.3	-0.82	0.27	0.92	0.77	-0.72	-0.05	0.69	0.78
YDL085W	NDE2	1	0.21	-0.79	-1.98	-2.44	0.18	-1	-2.23	-2.86	0.5	-0.73	-1.17	-1.97	0.01	-1.4	-2.14	-2.47	0.17	-1.34	-2.16	-2.88	-0.23	-1.23	-1.27	-2.74
YDL130W	RPP1B	1	-0.01	0.47	0.97	1.33	-0.3	0.5	1.55	1.6	0.04	0.88	1.66	1.68	-0.34	1.49	1.46	1.98	0.52	1.49	2.29	2.22	1.21	1.62	2.21	1.87
YDL169C	UGX2	1	0.22	-0.41	-0.84	-1.2	0.39	-0.61	-0.88	-1.56	0.23	-0.14	-0.58	-1.11	0.53	-0.56	-1.05	-1.12	0.11	-0.63	-1.48	-1.57	0.13	-0.59	-0.7	-0.84
YDR070C	YDR070C	1	-0.04	-1.84	-2.14	-2.27	0.38	-2.02	-2.59	-2.97	0.25	-0.7	-1.33	-2.23	0.1	-2.43	-3.16	-3.11	-0.41	-1.69	-2.24	-3.61	-0.32	-1.82	-1.53	-2.9
YDR171W	HSP42	1	0.11	-1.5	-2.24	-2.24	0.38	-1.6	-2.36	-2.73	0.36	-1.05	-1.87	-2.52	0.82	-1.71	-2.44	-2.56	0.15	-1.39	-2.38	-2.53	0.36	-1.67	-1.94	-2.54
YDR258C	HSP78	1	0.19	-1.43	-1.45	-1.43	0.21	-1.47	-2	-1.92	0.15	-0.81	-1.51	-1.3	0.33	-1.42	-2.03	-1.99	-0.37	-1.06	-1.81	-1.83	-0.08	-1.67	-1.59	-2.13
YDR379C-A	YDR379C-A	1	0.47	0.74	0.25	-0.15	0.25	0.27	0.02	-0.32	0.46	0.63	0.84	0.17	0.13	0.33	0.38	0.36	0.85	0.83	0.49	0.06	0.89	0.62	0.52	0.43
YEL026W	SNU13	1	0.24	-0.43	0.54	0.97	-0.17	0.25	1.4	1.73	-0.31	0.6	0.99	1.25	-0.57	0.78	1.31	1.38	0.01	1.44	2.36	2.39	0.5	1.23	1.6	1.63
YEL040W	UTR2	1	0.63	1.64	2.49	2.82	0.46	2.2	3.13	3.16	0.71	2.13	2.54	2.44	0.17	2.53	2.99	3.13	0.64	2.24	2.97	3.24	1.22	2.96	3.25	3.2
YGL031C	RPL24A	1	-0.15	0.26	0.85	1.39	0.04	-0.05	1.18	1.7	-0.11	0.72	0.58	1.09	-0.04	0.55	0.56	0.96	-0.2	1.27	1.65	1.91	-0.42	0.26	0.85	1.92
YGL076C	RPL7A	1	-0.13	0.77	0.43	0.94	-0.72	-0.45	0.46	0.9	0.28	0.88	1.29	1.5	0.08	2.08	0.89	1.72	0.39	1.21	1.35	1.7	0.11	0.67	0.6	1.23
YGL121C	GPG1	1	0.13	-0.6	-0.96	-1.47	0.39	-0.84	-1.34	-1.77	0.32	-0.07	-0.06	-0.6	0.05	-1.07	-1.51	-1.79	0.47	-0.24	-0.77	-1.49	0.82	-0.23	-0.03	-0.54
YGL156W	AMS1	1	0.08	-0.67	-1	-1.34	0.32	-0.8	-1.29	-1.39	-0.03	-0.69	-0.91	-1.26	0.2	-0.84	-1.2	-1.5	0.03	-1.03	-1.18	-1.97	0.03	-0.83	-0.83	-1.8
YGR032W	GSC2	1	-0.37	-0.61	-0.83	-1.4	-0.23	-1.19	-1.7	-2.41	-0.86	-1.24	-1.84	-2.45	-0.89	-1.35	-1.76	-2.39	-0.65	-1.27	-1.79	-2.4	-0.46	-1.34	-1.27	-1.39
YGR043C	YGR043C	1	-0.04	-1.76	-2.39	-2.95	0.6	-1.94	-3.58	-3.93	-0.17	-1.5	-2.54	-3.15	0.42	-1.71	-3.98	-4.22	-0.6	-2.93	-2.95	-4.1	-0.5	-2.92	-2.9	-3.59
YGR070W	ROM1	1	-0.04	-0.33	-1.08	-1.38	0.17	-0.55	-0.94	-1.12	0.5	-0.06	-0.31	-0.83	0.02	-0.28	-0.77	-0.73	-0.14	-0.79	-1.02	-1.38	0.12	-0.7	-1	-1.01
YGR142W	BTN2	1	0.38	-2	-2.3	-2.44	0.61	-0.86	-2.49	-3.02	0.42	-1.26	-2.76	-3.12	0.58	-1.15	-2.8	-3.03	0.36	-0.29	-1.38	-2.25	0.37	-1.5	-1.68	-2.83
YGR236C	SPG1	1	1.18	-1.16	-1.95	-2.14	1.15	-0.99	-2.14	-2.25	1.26	-0.03	-1.03	-2.12	0.91	-1.42	-2.18	-2.61	0.72	-0.72	-0.88	-1.99	1.03	-1.26	-1.29	-2.02
YGR256W	GND2	1	0	-1.76	-2.9	-3.19	0.31	-2.09	-3.27	-3.66	0.25	-1.19	-2.23	-3.29	0.27	-1.56	-3.46	-3.55	-0.11	-2.42	-3.1	-4.05	-0.09	-2.08	-2.1	-3.37
YHR096C	HXT5	1	-0.16	-1.98	-3.22	-4.34	-0.02	-2.24	-4.11	-5.05	-0.28	-1.85	-3.2	-4.2	-0.32	-2.7	-4.26	-4.82	-0.63	-3.48	-4.01	-5.31	-0.53	-3.16	-3.25	-4.29
YHR128W	FUR1	1	-0.31	-0.04	0.36	0.84	0.17	0.84	1.19	1.6	0.1	0.54	0.99	1.29	-0.24	1.37	1.36	1.7	0.01	0.99	1.58	1.93	-0.19	0.79	0.78	1.38
YHR138C	YHR138C	1	0.36	-0.29	-0.07	-0.07	0.27	-0.18	-0.21	-0.07	0.22	-0.1	-0.01	-0.59	0.06	-0.48	-0.45	-0.6	0.64	0.4	0.97	0.11	0.78	0.01	0.51	0.26
YIL136W	OM45	1	0.2	-0.83	-1.42	-2.13	0.04	-1.34	-2.49	-3.14	0.39	-0.58	-1.6	-1.56	0.62	-1.41	-2.48	-2.63	0.16	-1.18	-1.73	-2.1	-0.09	-1.57	-1.9	-2.89
YIL160C	POT1	1	0.5	-1.48	-2.43	-2.81	1.12	-1.65	-3.04	-3.57	1.11	-0.28	-2.05	-3.24	0.91	-1.71	-3.04	-3.42	0.32	-1.81	-2.23	-3.64	0.18	-2.08	-2.06	-4.1
YIR016W	YIR016W	1	0.24	0.21	-0.01	-0.21	0.09	-0.79	-1.11	-1.04	-0.09	-0.64	-0.65	-1.19	0.08	-0.79	-1.21	-1.22	0.32	-0.3	-0.35	-0.68	0.07	-0.67	-0.72	-0.77
YJL116C	NCA3	1	-1.02	-2.85	-2.74	-3.3	0.04	-2.92	-4.15	-4.19	-1.54	-3.07	-4	-4.05	-0.82	-2.91	-4.2	-4.26	-1.29	-3.52	-3.81	-4.31	-0.62	-3.46	-3.22	-3.91
YJL161W	YJL161W	1	0.42	0.17	0.11	0.04	0.86	0.43	0.16	0.28	0.56	0.67	1.13	0.87	0.17	1.01	0.17	0.13	1.32	1.25	0.75	0.57	0.77	0.65	0.6	1.13
YJR008W	YJR008W	1	0.19	-0.77	-0.88	-1.14	0.28	-0.84	-0.86	-0.61	0.29	-0.24	-0.42	-0.54	0.33	-0.59	-1.07	-1.24	-0.25	-0.75	-0.76	-1.2	-0.06	-0.56	-0.48	-0.91
YKR046C	PET10	1	-0.07	-0.58	-1.39	-1.84	0.2	-0.72	-1.43	-2.2	0.19	-0.57	-1.19	-1.84	-0.2	-0.63	-1.11	-1.47	-0.25	-1.56	-2.22	-2.62	-0.06	-0.83	-1.05	-1.73
YLL026W	HSP104	1	0.04	-1.93	-2.32	-2.42	0.23	-1.34	-2.32	-2.16	0.24	-1.09	-2.07	-2.17	0.56	-1.31	-2.42	-2.66	-0.21	-1.44	-1.98	-2.51	-0.18	-2.19	-2.16	-3.29
YLL067C	YLL067C	1	0	-0.81	-1.53	-1.91	-0.26	-1.28	-1.97	-2.48	0.07	-0.82	-1.42	-2.03	0.62	-1.09	-1.7	-1.95	0.06	-1.36	-1.74	-2.1	0.17	-1.3	-1.46	-2.03
YLR178C	TFS1	1	0.16	-1.02	-1.54	-1.63	0.56	-0.84	-1.1	-0.87	0.46	-0.29	-0.25	-0.81	0.53	-1.3	-1.05	-1.24	0.6	-0.43	-1.01	-1.61	-0.41	-1.23	-1.35	-1.48
YLR312C	YLR312C	1	0.14	-0.82	-1.63	-2.1	0.12	-0.73	-1.33	-1.52	0.24	-0.59	-1.05	-1.7	0.38	-0.94	-0.89	-1.16	0.55	-1.05	-1.21	-1.84	0.33	-0.65	-0.81	-1.51
YLR327C	TMA10	1	0.42	0.2	-0.17	-0.35	0.24	-0.09	-0.73	-0.89	0.36	-0.29	-0.45	-0.88	0.97	0.56	-0.9	-0.86	0.34	-0.62	-0.71	-1.01	0.62	-0.69	-1.01	-0.65
YLR406C	RPL31B	1	-0.13	0.3	0.73	1.32	-0.05	0.56	1.86	2.44	-0.24	0.58	0.78	1.14	0.11	0.85	1.53	1.62	0.01	1.06	1.93	1.95	0.11	0.55	1.27	1.21
YML056C	IMD4	1	-0.22	0.08	1.02	1.4	-0.55	0.67	1.42	1.82	-0.24	0.57	0.67	1.56	-0.61	0.75	1.46	1.74	-0.3	1.23	1.81	2.34	-0.31	0.87	1.13	1.94
YML128C	MSC1	1	0	-1.49	-2.24	-2.77	0.1	-2.21	-3.55	-3.76	-0.09	-1.58	-2.56	-2.91	-0.13	-2.69	-3.79	-4.01	-0.84	-2.95	-3.77	-4.46	-0.81	-2.82	-2.96	-3.9
YMR174C	PAI3	1	0.39	-1.17	-1.27	-1.59	0.22	-1.19	-1.54	-2.04	0.43	-0.25	-0.96	-1.49	0.36	-1.25	-1.86	-1.92	0.29	-1.22	-0.97	-1.92	0.56	-0.85	-0.52	-1.71
YMR196W	YMR196W	1	0.26	-0.4	-1.3	-1.5	0.13	-0.82	-1.69	-1.77	0.29	-0.51	-0.82	-1.45	0.26	-0.92	-1.69	-1.7	-0.15	-1.66	-1.98	-2.44	-0.41	-1.54	-1.82	-2.52
YMR242C	RPL20A	1	-0.3	0.11	0.29	0.5	0.01	0.16	0.65	0.8	0.18	0.87	1.21	1.17	0.16	-0.78	1.21	1.47	-0.03	0.79	0.7	1.23	-0.04	0.49	0.26	0.65
YMR322C	SNO4	1	-0.3	-2.21	-2.45	-2.76	-0.03	-2.29	-3.36	-3.45	-0.5	-1.48	-2.26	-3.15	-0.45	-2.72	-3.48	-3.53	-0.98	-3.09	-3.32	-4.25	-0.93	-2.42	-2.33	-3.46
YNL093W	YPT53	1	0.2	-0.12	-0.61	-0.99	0.12	-1.14	-2.16	-3.11	0.05	-0.75	-1.49	-2.01	0.11	-1.4	-1.94	-2.22	-0.21	-1.18	-1.91	-1.97297	-0.3	-1.35	-1.74	-1.7
YNL237W	YTP1	1	0.48	0.76	0.55	0.05	0	0.2	-0.52	-1.12	0.18	0.15	0.07	-0.39	-0.35	0.01	-0.6	-0.94	0.01	-0.17	-0.39	-0.8	0.53	-0.01	-0.17	-0.7
YNL301C	RPL18B	1	-0.08	0.18	0.83	1.27	-0.19	-0.18	0.65	1.71	-0.18	0.06	0.44	0.96	-0.26	0.04	0.73	0.73	-1.1	-0.05	0.49	0.6	-1.1	-0.33	0.06	0.8
YOL039W	RPP2A	1	-0.17	0.45	0.95	1.44	-0.11	0.64	1.56	1.59	-0.05	0.82	1.14	1.23	-0.45	0.67	1.11	1.44	-0.28	1.29	1.74	1.67	0.02	1.01	1.53	1.66
YOL052C-A	DDR2	1	-0.32	-1.57	-2.25	-2.64	-0.93	-2.88	-2.75	-3.54	0.08	-0.45	-1.11	-1.48	-0.79	-0.77	-2.3	-2.4	-0.35	-1.62	-1.96	-2.62	-0.6	-1.15	-0.87	-2.43
YOL084W	PHM7	1	0.24	-0.87	-1.59	-2.38	-0.02	-0.87	-2.03	-2.61	-0.08	-0.91	-1.36	-2.09	-0.39	-1.59	-2.4	-2.97	-0.25	-2.38	-2.32	-3.42	0.21	-1.47	-1.57	-2.84
YOL120C	RPL18A	1	-0.14	0.53	1	1.45	0.13	0.5	1.58	1.77	0.06	0.81	1.11	1.66	-0.31	0.93	1.56	1.82	0.45	1.7	2.24	2.53	-0.03	1.04	1.49	2.34
YOR167C	RPS28A	1	-0.2	0.88	0.77	1.17	-0.77	-0.29	0.86	0.81	0.17	1.05	1.25	1.3	-0.34	1.64	0.95	1.91	0.09	0.99	1.47	1.55	-0.27	0.39	1.23	1.41
YOR173W	DCS2	1	0.14	-0.72	-1.47	-1.65	0.2	-0.78	-1.69	-1.76	0.33	-0.46	-0.66	-1.24	0.49	-1.08	-1.76	-1.99	0.23	-0.98	-1.53	-2	-0.23	-1.38	-1.55	-1.87
YOR338W	YOR338W	1	-0.35	-1.37	-1.76	-2	-0.07	-1.41	-1.87	-1.74	0.07	-1.23	-1.52	-1.81	-0.1	-0.62	-1.53	-1.81	-0.55	-1.85	-2.27	-2.67	-0.65	-1.6	-1.85	-1.8
YPL186C	UIP4	1	0.02	-1.2	-1.62	-2	0.05	-1.24	-2.17	-2.95	0.17	-0.67	-1.65	-1.82	0.33	-1.47	-2.56	-2.73	0.22	-0.97	-1.45	-1.9	-0.3	-1.43	-1.52	-1.85
YPL280W	HSP32	1	-0.26	-2.17	-2.28	-2.75	-0.13	-2.37	-3.27	-3.32	-0.47	-1.51	-2.18	-3.03	-0.53	-2.64	-3.48	-3.53	-1.15	-2.94	-3.34	-4.12	-0.87	-2.43	-2.35	-3.18
