# Supplementary material for: Predicting Cellular Growth from Gene Expression Signatures
Source: PLoS Comput Biol. 2009 Jan 2;5(1):e1000257. doi: 10.1371/journal.pcbi.1000257 (PMC2599889; doi:10.1371/journal.pcbi.1000257)
Supplement: Table S3 — Expression of growth-specific genes for batch cultures grown on glucose, galactose, and galactose with a constitutively activated Ras/PKA pathway. We constructed a gal1 deletion strain carrying the activated allele RAS2(G19V) under control of the galactose inducible GAL10 promoter. Addition of galactose activates the Ras/PKA pathway, but since galactose cannot be metabolized by this strain, the metabolic state of the cell remains unaltered. Gene expression was then assayed at 20, 40, 60, and 80 minutes (relative to time 0) after nutrient exposure. (Here we provide expression data for all the growth-specific genes. See [9] for additional data.) (0.03 MB XLS) [file pcbi.1000257.s007.xls]

## Sheet: tmp
Supplemental Table S3: Calibration gene microarray data for batch cultures grown on glucose, galactose, and galactose with a constitutively activated Ras/PKA pathway. We constructed a gal1 deletion strain carrying the activated allele RAS2(G19V) under control of the galactose inducible GAL10 promoter. Addition of galactose activates the Ras/PKA pathway, but since galactose cannot be metabolized b…
YORF	NAME	GWEIGHT	WT glu 20/0	WT glu 40/0	WT glu 60/0	WT glu 80/0	WT gal 20/0	WT gal 40/0	WT gal 60/0	WT gal 80/0	Ras* gal 20/0	Ras* gal 40/0	Ras* gal 60/0	Ras* gal 80/0
Q0130	OLI1	1	-2.98	-3.57	-3.65	-4.52	-0.37	-0.52	-0.45	-1.04	-0.85	-2.08	-3.23	-3.69
YBL048W	YBL048W	1	-2.33	-3.95	-4.26	-4.57	0.12	0.01	-0.17	-0.33	-0.01	-1.33	-2.58	-2.92
YBL049W	MOH1	1	-1.86	-3.15	-3.56	-4.69	0.32	0.24	-0.17	-0.06	0.12	-0.85	-1.69	-1.89
YBL087C	RPL23A	1	2.03	2.25	2.27	2.48	-0.12	-0.05	0.02	0.25	-0.33	1.5	2.17	2.06
YBR072W	HSP26	1	-6.33	-6.64	-6.64	-6.64	0.15	0.15	-0.54	-0.91	-0.23	-2.93	-5.52	-6.14
YBR085W	AAC3	1	2.88	2.29	2.65	2.47	-0.61	-0.19	0.15	0.15	-0.02	1.69	2.42	2.85
YBR116C	YBR116C	1	-5.79	-5.56	-5.76	-6.49	0.86	1.01	0.09	-0.46	0.47	-3.25	-5.46	-5.83
YBR169C	SSE2	1	-4.1	-4.19	-4.23	-4.38	0.38	0.45	-0.08	-0.26	0.44	-2.12	-3.63	-3.85
YBR291C	CTP1	1	3.14	1.39	-0.12	-0.27	-0.59	-0.06	0.33	0.08	-0.31	2.52	2.36	2.76
YCR021C	HSP30	1	-1.53	-2.07	-2.28	-2.08	1	0.61	-0.45	-0.92	0.25	-1.32	-1.18	-1.19
YDL014W	NOP1	1	3.03	2.78	2.71	2.6	-1.04	-0.13	0.28	0.21	-0.38	2.6	2.77	2.67
YDL081C	RPP1A	1	1.59	1.84	1.9	1.9	-0.37	-0.24	-0.16	0.07	-0.41	1.15	1.85	1.87
YDL085W	NDE2	1	-4.66	-4.31	-4.42	-5.48	0.3	0.39	-0.26	-0.25	0.16	-2.49	-3.89	-4.17
YDL130W	RPP1B	1	1.09	1.5	1.54	1.57	-0.32	-0.26	-0.04	0	-0.54	0.98	1.65	1.66
YDL169C	UGX2	1	-3.56	-3.47	-3.71	-4.66	0.47	0.2	-0.21	-0.06	0.43	-2.02	-2.86	-2.89
YDR070C	YDR070C	1	-2.56	-4.29	-4.29	-4.56	0.2	0.45	-0.38	-0.62	-0.27	-1.36	-3.08	-3.39
YDR171W	HSP42	1	-4.49	-4.47	-4.52	-4.92	0.98	0.46	-0.35	-0.45	0.68	-2.72	-4.27	-4.4
YDR258C	HSP78	1	-4.85	-5.01	-4.71	-4.3	0.52	-0.01	-0.3	-0.37	0.14	-2.76	-4.14	-4.55
YDR379C-A	YDR379C-A	1	-1.54	-2.64	-2.48	-2.6	0.11	0.25	-0.09	-0.22	0.27	-0.59	-0.77	-0.27
YEL026W	SNU13	1	2.81	2.82	2.6	2.46	-0.92	-0.29	0.15	0.02	-0.49	2.46	2.88	2.53
YEL040W	UTR2	1	2.73	2.77	2.91	2.79	-0.97	-0.13	0.49	0.21	-0.11	2.43	2.54	2.42
YGL031C	RPL24A	1	0.93	1.23	1.46	1.47	-0.03	-0.01	-0.17	0.39	-0.34	1.09	1.7	1.94
YGL076C	RPL7A	1	1.98	2.16	2.21	2.42	-0.26	-0.12	-0.6	0.12	-0.35	1.45	2.13	2.26
YGL121C	GPG1	1	-1.81	-3.39	-4.01	-4.57	-0.01	0.26	0.25	-0.06	-0.08	-1.31	-2.67	-3.31
YGL156W	AMS1	1	-3.97	-4.54	-4.62	-4.61	0.16	0.45	-0.02	-0.13	0	-2.13	-3.75	-4.08
YGR032W	GSC2	1	-2.32	-2.09	-2.41	-2.99	-0.09	-0.39	0.06	0.06	0.05	-0.74	-1.04	-1.07
YGR043C	YGR043C	1	-4.94	-5.56	-5.64	-6.27	0.73	0.64	-0.26	-0.3	0.28	-2.88	-5.15	-5.46
YGR070W	ROM1	1	-2	-2.25	-2.28	-2.42	0.48	0.15	0.04	0.01	0.29	-1.64	-1.77	-1.77
YGR142W	BTN2	1	-2.55	-2.53	-2.16	-1.37	0.7	0.65	-0.19	-0.48	0.6	-1.31	-2.6	-2.9
YGR236C	SPG1	1	-5.93	-5.63	-5.68	-6.51	1.06	0.63	-0.23	-0.53	-0.01	-3.67	-5.06	-5.3
YGR256W	GND2	1	-3.5	-3.8	-3.94	-4.53	0.53	0.74	-0.31	-0.4	0.29	-1.97	-3.51	-3.8
YHR096C	HXT5	1	-4.12	-5.3	-5.46	-6.31	0.95	0.38	-0.38	-0.31	0.64	-2.51	-3.8	-4.25
YHR128W	FUR1	1	1.88	2.12	2.37	2.52	-0.55	-0.35	-0.1	0.07	0.08	1.74	2.57	2.77
YHR138C	YHR138C	1	-2.71	-3.7	-3.86	-4.41	0.26	0.27	0.1	-0.17	-0.17	-1.2	-2.45	-2.8
YIL136W	OM45	1	-6.28	-5.78925	-5.67	-6.64	0.89	0.71	0.11	0.09	0.23	-3.96	-6.06	-6.39
YIL160C	POT1	1	-4.84	-5.14	-5.33	-5.98	0.13	0.41	0.16	-0.17	0.14	-2.91	-4.88	-4.99
YIR016W	YIR016W	1	-3.21	-3.26	-3.33	-3.63	0.06	0.07	0.03	-0.33	-0.21	-2.77	-2.91	-2.92
YJL116C	NCA3	1	-0.56	-2.39	-3.56	-4.11	-0.23	-0.15	-0.12	0.3	-0.14	0.12	-0.84	-1.68
YJL161W	YJL161W	1	-2.98	-3.27037	-3.74	-2.56	0.74	0.2	-0.28	-0.2	0.33	-2.06	-2.59	-2.82
YJR008W	YJR008W	1	-4.74	-4.46	-4.35	-4.55	0.36	0.43	0.12	-0.02	-0.43	-3.24	-4.49	-4.38
YKR046C	PET10	1	-2.7	-2.97	-2.61	-2.7	-0.02	0.2	-0.25	-0.3	0.28	-1.75	-3.05	-2.85
YLL026W	HSP104	1	-5.25	-5.55	-5.35	-5.07	0.56	0.23	-0.2	-0.39	0.1	-3.29	-5.17	-5.71
YLL067C	YLL067C	1	-2.28	-2.12	-2.17	-2.6	0.39	0.19	0.11	0.18	0.37	-1.74	-2.86	-3.05
YLR178C	TFS1	1	-4.73	-4.76	-4.77	-5.05	0.48	0.3	-0.48	-0.39	0.2	-3.06	-4.58	-4.62
YLR312C	YLR312C	1	-5.05	-5.21	-5.34	-5.74	0.19	0.09	-0.58	-0.29	0.13	-2.47	-3.44	-3.84
YLR327C	YLR327C	1	-6.64	-6.63	-6.64	-6.64	0.63	0.14	-0.45	-0.47	0.11	-4.57	-4.99	-3.62
YLR406C	RPL31B	1	2.04	2.05	2.18	2.31	-0.39	-0.07	-0.07	0.05	-0.52	1.69	2.32	2.14
YML056C	IMD4	1	3.5	3.39	3.68	3.43	-1.08	-0.54	-0.03	-0.14	0.17	3.32	3.6	3.54
YML128C	MSC1	1	-5.44	-5.03	-5	-5.64	0.78	0.86	-0.42	-0.34	0.43	-3.15	-4.98	-5.01
YMR174C	PAI3	1	-2.3	-3.4	-3.76	-4	0.25	0.7	0.07	-0.25	-0.32	-1.34	-2.85	-3.49
YMR196W	YMR196W	1	-4.2	-4.36	-4.25	-4.51	0.41	0.15	0.06	-0.07	0.3	-3.09	-4.18	-3.97
YMR242C	RPL20A	1	1.23	1.69	1.73	1.96	-0.33	-0.2	-0.4	0.23	0.31	0.92	1.33	1.55
YMR322C	SNO4	1	-3.86	-3.99	-4.09	-4.68	0.47	0.56	-0.21	-0.26	-0.06	-1.84	-3.16	-3.28
YNL093W	YPT53	1	-2.79	-3.24184	-3.68	-3.46642	0.72	0.46	-0.33	-0.12	0.28	-1.63	-2.21	-2.55
YNL237W	YTP1	1	-4.02	-3.9	-4.16	-4.59	0.24	0.06	-0.28	-0.11	0.17	-2.76	-3.34	-3.58
YNL301C	RPL18B	1	2.88	2.41	2.47	2.72	-0.57	-0.19	-0.59	0.02	-0.49	1.89	2.61	2.67
YOL039W	RPP2A	1	0.93	1.35	1.46	1.51	-0.32	-0.08	-0.26	0.08	-0.59	0.79	1.39	1.39
YOL052C-A	DDR2	1	-3.99	-4.17	-4.14	-4.54	0.2	0.48	-0.47	-0.49	-0.4	-2.02	-3.39	-3.8
YOL120C	RPL18A	1	1.28	1.53	1.74	1.92	-0.41	-0.15	-0.37	0.12	-0.32	1.29	2.11	2.18
YOR167C	RPS28A	1	1.11	1.51	1.51	1.68	-0.35	-0.08	-0.26	0.11	-0.47	1.2	1.94	1.87
YOR173W	DCS2	1	-4.4	-4.41	-4.68	-4.76	0.76	0.3	-0.36	-0.13	0.29	-3.2	-4.3	-4.46
YOR338W	YOR338W	1	3.18	0.76	-0.41	-1.09	-0.37	-0.2	-0.04	-0.05	1.17	3.32	2.96	2.6
YPL186C	UIP4	1	-4.43	-5.82	-5.94	-6.61	0.23	0.17	-0.08	-0.16	0.01	-2.91	-4.86	-5.47
YPL280W	HSP32	1	-3.55	-3.79	-3.84	-4.3	0.41	0.53	-0.2	-0.3	-0.08	-1.96	-3.06	-3.16
