# Supplementary material for: Predicting Cellular Growth from Gene Expression Signatures
Source: PLoS Comput Biol. 2009 Jan 2;5(1):e1000257. doi: 10.1371/journal.pcbi.1000257 (PMC2599889; doi:10.1371/journal.pcbi.1000257)
Supplement: Table S5 — S. cerevisiae growth-specific genes used for growth rate prediction in this study with S. bayanus and S. pombe orthologs. S. cerevisiae growth-specific genes were defined to have a bootstrapped p-value of growth rate response and linear fit less than 10−5. S. bayanus orthologs were drawn from [19] and S. pombe orthologs from [20]. (0.00 MB XLS) [file pcbi.1000257.s009.xls]

S. cerevisiae	S. bayanus	S. pombe
YEL040W	YEL040W	SPBC21B10.07
YOL014W	YOL014W
YGL076C		SPAC664.06	SPAC3H5.07	SPBC18H10.12C
YML056C	YML056C	SPBC2F12.14C
YOL039W	YOL039W	SPAC1071.08	SPBC23G7.15C	SPBP8B7.06
YOL120C	YOL120C	SPAPB17E12.13	SPBC11C11.07
YDL081C		SPCP1E11.09C	SPBC3B9.13C	SPAC644.15
YOR167C	YOR167C	SPCC285.15C	SPAC25G10.06
YNL301C		SPAPB17E12.13	SPBC11C11.07
YDL130W	YDL130W	SPCP1E11.09C	SPBC3B9.13C	SPAC644.15
YLR406C	YLR406C	SPAC890.08
YDL014W	YDL014W	SPBC2D10.10C
YBR085W		SPBC530.10C
YMR242C	YMR242C	SPAC26A3.04	SPAC3A12.10
YEL026W	YEL026W	SPAC607.03C
YBR291C	YBR291C	SPAC19G12.05
YBL087C	YBL087C	SPCC1322.11	SPAC3G9.03
YGL031C		SPAC22E12.13C	SPCC330.14C	SPAC6G9.09C
YHR128W	YHR128W	SPAC1B3.01C	SPAC1399.04C	SPAC1002.17C
YLR112W
YLR149C		SPCC4G3.03
YJL144W	YJL144W
YNL237W	YNL237W	SPBC3B8.06
YLL067C
YGR070W	YGR070W	SPAC1006.06	SPCC645.07
YHR138C	YHR138C
YJR008W	YJR008W	SPAC4H3.04C
YGR142W	YGR142W
YDR379C-A	YDR379C-A	SPAC664.12C
YDR258C	YDR258C	SPBC4F6.17C
YOR338W	YOR338W	SPCC1682.13	SPAC14C4.12C
YLR178C
YDL169C	YDL169C
YKR046C	YKR046C
YGR032W	YGR032W	SPCC1840.02C	SPAC19B12.03	SPAC24C9.07C	SPBC19G7.05C
YGR236C	YGR236C
YJL161W	YJL161W
YMR196W	YMR196W
YDR070C	YDR070C
YMR174C	YMR174C
YPL280W		SPCC757.03C	SPBC947.09	SPAC5H10.02C	SPAC1F7.06	SPAC11D3.13
YDL085W	YDL085W	SPBC947.15C	SPAC3A11.07
YMR322C		SPCC757.03C	SPBC947.09	SPAC5H10.02C	SPAC1F7.06	SPAC11D3.13
YGL156W	YGL156W	SPAC513.05
YLL026W		SPBC16D10.08C
YNL093W	YNL093W	SPAC6F6.15
YBR169C	YBR169C	SPAC110.04C
YCR021C	YCR021C	SPCC31H12.02C
Q0130		SPMIT.10
YIL136W	YIL136W
YGR256W	YGR256W	SPBC660.16
YOL052C-A
YML128C	YML128C	SPAC23C4.05C	SPBC365.12C
YDR171W	YDR171W	SPCC338.06C	SPBC3E7.02C
YOR173W	YOR173W	SPBP4H10.20
YBL049W	YBL049W	SPAPJ691.02
YLR312C	YLR312C
YPL186C	YPL186C
YJL116C	YJL116C	SPBC2G2.17C	SPAC1002.13C
YGL121C	YGL121C
YGR043C	YGR043C	SPCC1020.06C
YLR327C	YLR327C
YBL048W
YIL160C	YIL160C
YBR116C
YBR072W	YBR072W	SPCC338.06C	SPBC3E7.02C
YHR096C	YHR096C	SPCC548.06C	SPBC1348.14C	SPCC1235.13	SPCC1235.14	SPBC1683.08	SPAC1F8.01	SPBC4B4.08	SPCC548.07C
